# Supplementary material for: Genome-wide association study using whole-genome sequencing identifies risk loci for Parkinson’s disease in Chinese population
Source: PubMed Central journal article supplement (PMC9911746; doi:10.1038/s41531-023-00456-6), 2023-02-09
Supplement: 41531_2023_456_MOESM1_ESM.pdf [file 41531_2023_456_MOESM1_ESM.pdf]

**Supplementary Table 1. Genotyping quality of whole genome sequencing of GWAS cohort**

| <b>Items (N = 4496)</b>          | <b>Mean <math>\pm</math> Standard deviation</b> |
|----------------------------------|-------------------------------------------------|
| raw total sequences (Mega bases) | 271.27 $\pm$ 61.01                              |
| reads properly paired (%)        | 96.48 $\pm$ 1.55                                |
| reads duplicated (%)             | 6.97 $\pm$ 2.72                                 |
| average quality                  | 34.51 $\pm$ 1.709                               |
| insert size average              | 394.72 $\pm$ 27.00                              |
| insert size standard deviation   | 98.32 $\pm$ 28.98                               |
| mean depth ( $\times$ )          | 13.99 $\pm$ 3.10                                |
| coverage $\geq$ 1 (%)            | 99.13 $\pm$ 0.35                                |
| coverage $\geq$ 5 (%)            | 94.63 $\pm$ 2.21                                |
| coverage $\geq$ 10 (%)           | 67.70 $\pm$ 12.32                               |

**Supplementary Table 2. Genotyping quality of multiplex PCR amplicons sequencing of replication cohort**

| <b>Items (N = 17870)</b>       | <b>Mean <math>\pm</math> Standard deviation</b> |
|--------------------------------|-------------------------------------------------|
| Target average read length     | 148.82 $\pm$ 0.39                               |
| Target average base quality    | 36.09 $\pm$ 0.19                                |
| Target average insert size     | 213.08 $\pm$ 4.85                               |
| Total reads mapping rate (%)   | 90.90 $\pm$ 4.39                                |
| Target mean depth ( $\times$ ) | 2598.61 $\pm$ 1241.15                           |
| coverage $\geq$ 4 (%)          | 99.03 $\pm$ 0.15                                |
| coverage $\geq$ 10 (%)         | 98.89 $\pm$ 0.20                                |
| coverage $\geq$ 20 (%)         | 98.71 $\pm$ 0.36                                |
| coverage $\geq$ 30 (%)         | 98.55 $\pm$ 0.56                                |

**Supplementary Table 3. Exclusion criteria for quality control parameters for GWAS and replication cohorts**

| Exclusion criteria                                                                        | GWAS cohort       |                 | Replication cohort |                 |
|-------------------------------------------------------------------------------------------|-------------------|-----------------|--------------------|-----------------|
|                                                                                           | Variants included | Sample included | Variants included  | Sample included |
| Original                                                                                  | 80,993,588        | 4,496           | 90                 | 17,870          |
| MAF < 0.01*, non-autosnp                                                                  | 7,121,791         | -               | -                  | -               |
| Multi-allelic variants                                                                    | 7,110,010         |                 |                    |                 |
| Variants with high missing rate (> 5%)                                                    | -                 | -               | 90                 | -               |
| Variants deviating from Hardy-Weinberg equilibrium in controls ( $P < 1 \times 10^{-4}$ ) | 6,910,086         | -               | 90                 | -               |
| Samples with high missing rate (> 5%)                                                     | -                 | 4,496           | -                  | 17,633          |
| Heterozygosity rate (deviating from mean $\pm 3$ standard deviations)                     | -                 | 4,480           | -                  | -               |
| Relatedness (identity by descent > 0.15)                                                  | -                 | 4,450           | -                  | -               |
| Ancestry outliers                                                                         | -                 | 4,450           | 90                 | 17,663          |
| Final inclusion                                                                           | 6,910,086         | 4,450           | 90                 | 17,663          |

\*, GBA-L444P had MAF less than 0.01 in our GWAS and replication cohort but was still included due to its importance; MAF, minor allele frequency; autosnp, autosomal single nucleotide polymorphism.

**Supplementary Table 4. Demographics of GWAS and replication cohorts**

|                    | GWAS cohort  |              | Replication cohort |              |
|--------------------|--------------|--------------|--------------------|--------------|
|                    | Cases        | Controls     | Cases              | Controls     |
| N                  | 1,972        | 2,478        | 8,209              | 9,454        |
| Age at recruitment | 66.76 ± 7.08 | 62.32 ± 7.11 | 60.23 ± 11.20      | 64.29 ± 9.68 |
| Age at onset       | 61.88 ± 6.93 | -            | 57.77 ± 11.95      | -            |
| Sex (male/female)  | 991/981      | 1,010/1,468  | 4,489/3,720        | 4,480/4,974  |

**Supplementary Table 5. Association results of tag SNPs within significant loci**

| Locus | Tag SNP    | Position (hg19) | Effect allele | Other allele | GWAS cohort |       |          | Replication cohort |       |          | Combined |                         | Info  |
|-------|------------|-----------------|---------------|--------------|-------------|-------|----------|--------------------|-------|----------|----------|-------------------------|-------|
|       |            |                 |               |              | Beta        | Se    | <i>P</i> | Beta               | Se    | <i>P</i> | <i>P</i> | <i>P</i> <sub>het</sub> |       |
| 1     | rs11557080 | chr1:205737739  | G             | A            | -0.249      | 0.046 | 6.08E-08 | -0.206             | 0.024 | 1.80E-18 | 1.04E-24 | 0.3985                  | Known |
| 2     | rs12042698 | chr1:225673483  | G             | A            | -0.384      | 0.084 | 5.15E-06 | -0.019             | 0.040 | 0.637    | 0.017    | 9.36E-05                | New   |
| 3     | rs1962462  | chr3:116777735  | T             | C            | -0.240      | 0.050 | 1.48E-06 | 0.011              | 0.025 | 0.657E   | 0.075    | 7.01E-06                | New   |
| 4     | rs76201116 | chr3:117938522  | C             | T            | 0.656       | 0.146 | 7.18E-06 | -0.026             | 0.070 | 0.710    | 0.109    | 2.57E-05                | New   |
| 5     | rs75364297 | chr4:72209030   | G             | A            | -0.576      | 0.120 | 1.64E-06 | 0.051              | 0.054 | 0.347    | 0.267    | 1.96E-06                | New   |
| 6     | rs356182   | chr4:90626111   | A             | G            | -0.344      | 0.049 | 1.52E-12 | -0.342             | 0.025 | 2.56E-42 | 3.09E-53 | 0.970                   | Known |
| 7     | rs78246001 | chr5:150753630  | C             | G            | -0.343      | 0.075 | 4.20E-06 | 0.029              | 0.044 | 0.502    | 0.081    | 1.63E-05                | New   |
| 8     | rs997368   | chr6:112243291  | G             | A            | -0.160      | 0.046 | 5.37E-04 | -0.109             | 0.023 | 3.39E-06 | 1.11E-08 | 0.326                   | Known |
| 9     | rs34594498 | chr12:40646786  | T             | C            | 0.984       | 0.209 | 2.47E-06 | 0.855              | 0.108 | 2.64E-15 | 4.05E-20 | 0.586                   | Known |
| 10    | rs10147229 | chr14:95384896  | G             | A            | -0.289      | 0.065 | 7.99E-06 | -0.026             | 0.033 | 0.433    | 0.007    | 2.83E-04                | New   |
| 11    | rs2251086  | chr15:61997385  | T             | C            | -0.191      | 0.061 | 1.77E-03 | -0.158             | 0.030 | 1.56E-07 | 1.19E-09 | 0.622                   | Known |
| 12    | rs73615920 | chr16:74114525  | A             | T            | 0.234       | 0.053 | 9.91E-06 | -0.017             | 0.028 | 0.529    | 0.137    | 2.56E-05                | New   |
| 13    | rs11079147 | chr17:53094754  | G             | A            | 0.200       | 0.045 | 7.33E-06 | -0.007             | 0.023 | 0.742    | 0.085    | 3.29E-05                | New   |
| 14    | rs61204179 | chr17:58139282  | T             | C            | 0.477       | 0.105 | 5.86E-06 | 0.242              | 0.054 | 7.91E-06 | 1.47E-09 | 0.047                   | New   |
| 15    | rs34596409 | chr19:13899223  | A             | G            | -0.387      | 0.086 | 6.05E-06 | -0.018             | 0.042 | 0.669    | 0.017    | 1.09E-04                | New   |

Beta, regression coefficient; Se, standard error of beta; *P*<sub>het</sub>, the *P*-value of heterogeneity; Info, information about if the significant loci known.

**Supplementary Table 6. Conditional analysis of loci reported to have multiple independent signals**

| Locus | Condition on                             | Most significant signal after condition |                 |               |              | GWAS cohort                                  |       |       |          | Replication cohort            |       |       | <i>P</i> <sub>com</sub> | <i>P</i> <sub>het</sub> |          |
|-------|------------------------------------------|-----------------------------------------|-----------------|---------------|--------------|----------------------------------------------|-------|-------|----------|-------------------------------|-------|-------|-------------------------|-------------------------|----------|
|       |                                          | SNP                                     | Position (hg19) | Effect allele | Other allele | R <sup>2</sup> with the tag SNP of the locus | Beta  | Se    | <i>P</i> | Considered an independent SNP | Beta  | Se    |                         |                         | <i>P</i> |
| 1     | rs11557080                               | rs823127                                | 1:205713139     | A             | G            | 0.51                                         | 1.306 | 0.071 | 1.68E-04 | No                            | -     | -     | -                       | -                       | -        |
| 6     | rs356182                                 | rs4694012                               | 4:90455143      | A             | G            | <0.01                                        | 1.361 | 0.074 | 3.38E-05 | No                            | -     | -     | -                       | -                       | -        |
| 9     | rs34594498                               | rs33949390                              | 12:40713845     | A             | G            | <0.01                                        | 0.680 | 0.144 | 2.46E-06 | Yes                           | 0.506 | 0.076 | 3.09E-11                | 1.08E-15                | 0.343    |
| 9     | rs34594498+<br>rs33949390                | rs34778348                              | 12:40757328     | C             | G            | <0.01                                        | 0.493 | 0.110 | 7.36E-06 | Yes                           | 0.643 | 0.061 | 4.26E-26                | 3.22E-30                | 0.233    |
| 9     | rs34594498+<br>rs33949390+<br>rs34778348 | rs1491924                               | 12:40587930     | C             | T            | <0.01                                        | 0.437 | 0.108 | 5.06E-05 | No                            | -     | -     | -                       | -                       | -        |

*P*<sub>com</sub>, the *P*-value of combined cohorts; *P*<sub>het</sub>, the *P*-value of heterogeneity.

**Supplementary Table 7. Genome-wide gene-based association results of top 20 significant genes in GWAS cohort by MAGMA**

| Gene            | Chr | Start     | Stop      | NSNPs | NPARAM | Zstat | P        | Symbol            |
|-----------------|-----|-----------|-----------|-------|--------|-------|----------|-------------------|
| ENSG00000145335 | 4   | 90645250  | 90759466  | 237   | 16     | 6.107 | 5.07E-10 | <i>SNCA</i>       |
| ENSG00000117280 | 1   | 205737114 | 205744588 | 15    | 2      | 5.469 | 2.26E-08 | <i>RAB7LI</i>     |
| ENSG00000133065 | 1   | 205758221 | 205782876 | 28    | 4      | 5.341 | 4.63E-08 | <i>SLC41A1</i>    |
| ENSG00000069275 | 1   | 205681947 | 205719404 | 37    | 6      | 4.396 | 5.52E-06 | <i>NUCKS1</i>     |
| ENSG00000158715 | 1   | 205626979 | 205649587 | 44    | 9      | 4.090 | 2.16E-05 | <i>SLC45A3</i>    |
| ENSG00000166263 | 17  | 53046088  | 53241646  | 589   | 21     | 3.715 | 1.01E-04 | <i>STXBP4</i>     |
| ENSG00000268313 | 1   | 205682497 | 205684153 | 2     | 1      | 3.712 | 1.03E-04 | <i>AC119673.1</i> |
| ENSG00000151892 | 10  | 117816444 | 118032979 | 569   | 51     | 3.696 | 1.10E-04 | <i>GFRA1</i>      |
| ENSG00000263563 | 17  | 21729601  | 21731762  | 6     | 2      | 3.650 | 1.31E-04 | <i>UBBP4</i>      |
| ENSG00000143184 | 1   | 168545711 | 168551315 | 24    | 6      | 3.623 | 1.45E-04 | <i>XCL1</i>       |
| ENSG00000186335 | 5   | 150694539 | 150727151 | 70    | 7      | 3.610 | 1.53E-04 | <i>SLC36A2</i>    |
| ENSG00000163067 | 2   | 95831177  | 95850065  | 16    | 5      | 3.598 | 1.60E-04 | <i>ZNF2</i>       |
| ENSG00000164023 | 4   | 108745719 | 108836203 | 151   | 24     | 3.573 | 1.76E-04 | <i>SGMS2</i>      |
| ENSG00000079308 | 2   | 218664512 | 218867718 | 533   | 70     | 3.570 | 1.78E-04 | <i>TNSI</i>       |
| ENSG00000144029 | 2   | 95752952  | 95815179  | 31    | 7      | 3.546 | 1.96E-04 | <i>MRPS5</i>      |
| ENSG00000175756 | 1   | 1309110   | 1310875   | 4     | 2      | 3.535 | 2.04E-04 | <i>AURKAIP1</i>   |
| ENSG00000242485 | 1   | 1337288   | 1342693   | 9     | 2      | 3.521 | 2.15E-04 | <i>MRPL20</i>     |
| ENSG00000155066 | 2   | 95940201  | 95957056  | 19    | 8      | 3.467 | 2.63E-04 | <i>PROM2</i>      |
| ENSG00000127419 | 4   | 926175    | 952444    | 60    | 15     | 3.435 | 2.96E-04 | <i>TMEM175</i>    |
| ENSG00000136867 | 9   | 115913222 | 115926417 | 61    | 11     | 3.429 | 3.02E-04 | <i>SLC31A2</i>    |

**Supplementary Table 8. Association results of reported GWAS SNPs in our GWAS cohort and replication cohorts and combined results**

| SNP ID     | Position(hg19) | EA | OA | Nearest Gene        | GWAS cohort |             |                     |        |       |          | Replication cohort |       |          | Combined |       |          |       |
|------------|----------------|----|----|---------------------|-------------|-------------|---------------------|--------|-------|----------|--------------------|-------|----------|----------|-------|----------|-------|
|            |                |    |    |                     | MAF_E<br>AS | MAF_<br>EUR | Effect_re<br>ported | Beta   | se    | P        | Beta               | se    | P        | Beta     | se    | P        | Phet  |
| rs356182   | 4:90626111     | A  | G  | <i>SNCA</i>         | 0.332       | 0.650       | -0.277              | -0.344 | 0.049 | 1.52E-12 | -0.342             | 0.025 | 2.56E-42 | -0.343   | 0.022 | 3.09E-53 | 0.970 |
| rs11557080 | 1:205737739    | G  | A  | <i>RAB29</i>        | 0.457       | 0.855       | -0.132              | -0.249 | 0.046 | 6.08E-08 | -0.206             | 0.024 | 1.80E-18 | -0.215   | 0.021 | 1.04E-24 | 0.399 |
| rs823118   | 1:205723572    | C  | T  | <i>NUCKS1</i>       | 0.453       | 0.414       | -0.107              | -0.239 | 0.045 | 1.34E-07 | -0.199             | 0.023 | 1.17E-17 | -0.208   | 0.021 | 1.38E-23 | 0.429 |
| rs823118*  | 1:205723572    | C  | T  | <i>NUCKS1</i>       | 0.453       | 0.414       | -0.107              | -0.066 | 0.181 | 7.17E-01 | -0.051             | 0.121 | 6.73E-01 | -0.055   | 0.101 | 5.81E-01 | 0.946 |
| rs10513789 | 3:182760073    | T  | G  | <i>MCCC1</i>        | 0.421       | 0.797       | 0.149               | 0.111  | 0.045 | 1.29E-02 | 0.190              | 0.023 | 2.47E-16 | 0.173    | 0.021 | 3.51E-17 | 0.118 |
| rs421016   | 1:155205043    | G  | A  | <i>GBA</i>          | 0.001       | 0.001       | -                   | 1.458  | 0.513 | 4.50E-03 | 2.151              | 0.295 | 2.97E-13 | 1.979    | 0.256 | 9.82E-15 | 0.242 |
| rs4698412  | 4:15737348     | A  | G  | <i>BST1</i>         | 0.363       | 0.574       | 0.104               | 0.140  | 0.045 | 1.76E-03 | 0.153              | 0.023 | 2.16E-11 | 0.150    | 0.020 | 1.41E-13 | 0.802 |
| rs2251086  | 15:61997385    | T  | C  | <i>VPS13C</i>       | 0.162       | 0.149       | -0.119              | -0.191 | 0.061 | 1.77E-03 | -0.158             | 0.030 | 1.56E-07 | -0.164   | 0.027 | 1.19E-09 | 0.622 |
| rs11158026 | 14:55348869    | C  | T  | <i>GCHI</i>         | 0.433       | 0.609       | 0.084               | 0.106  | 0.044 | 1.60E-02 | 0.124              | 0.023 | 4.45E-08 | 0.120    | 0.020 | 2.33E-09 | 0.718 |
| rs997368   | 6:112243291    | G  | A  | <i>FYN</i>          | 0.341       | 0.128       | -0.071              | -0.160 | 0.046 | 5.37E-04 | -0.109             | 0.023 | 3.39E-06 | -0.119   | 0.021 | 1.11E-08 | 0.326 |
| rs12456492 | 18:40673380    | G  | A  | <i>RIT2</i>         | 0.376       | 0.366       | 0.098               | 0.118  | 0.044 | 7.74E-03 | 0.102              | 0.023 | 6.61E-06 | 0.106    | 0.020 | 1.78E-07 | 0.746 |
| rs2248244  | 21:38852361    | A  | G  | <i>DYRK1A</i>       | 0.350       | 0.341       | 0.071               | 0.092  | 0.045 | 3.87E-02 | 0.109              | 0.023 | 3.16E-06 | 0.105    | 0.021 | 3.60E-07 | 0.749 |
| rs10847864 | 12:123326598   | G  | T  | <i>HIP1R</i>        | 0.486       | 0.660       | -0.148              | -0.042 | 0.044 | 3.38E-01 | -0.118             | 0.023 | 1.59E-07 | -0.102   | 0.020 | 3.64E-07 | 0.119 |
| rs34311866 | 4:951947       | C  | T  | <i>TMEM175</i>      | 0.133       | 0.216       | 0.213               | 0.206  | 0.062 | 8.74E-04 | 0.115              | 0.032 | 3.61E-04 | 0.134    | 0.029 | 2.58E-06 | 0.192 |
| rs10748818 | 10:104015279   | G  | A  | <i>GBF1</i>         | 0.334       | 0.131       | 0.079               | 0.081  | 0.046 | 7.41E-02 | 0.103              | 0.024 | 1.37E-05 | 0.098    | 0.021 | 2.87E-06 | 0.673 |
| rs6825004  | 4:77110365     | G  | C  | <i>SCARB2</i>       | 0.383       | 0.248       | -0.062              | -0.038 | 0.045 | 4.01E-01 | -0.113             | 0.024 | 1.47E-06 | -0.097   | 0.021 | 3.13E-06 | 0.136 |
| rs7938782  | 11:10558777    | G  | A  | <i>RNF141</i>       | 0.151       | 0.100       | -0.087              | -0.098 | 0.061 | 1.08E-01 | -0.130             | 0.031 | 3.42E-05 | -0.123   | 0.028 | 9.96E-06 | 0.651 |
| rs1474055  | 2:169110394    | T  | C  | <i>STK39</i>        | 0.324       | 0.104       | 0.180               | 0.074  | 0.046 | 1.06E-01 | 0.094              | 0.024 | 6.98E-05 | 0.090    | 0.021 | 1.92E-05 | 0.698 |
| rs1867598  | 5:60137959     | G  | A  | <i>ELOVL7</i>       | 0.046       | 0.085       | 0.155               | 0.158  | 0.094 | 9.26E-02 | 0.175              | 0.045 | 1.07E-04 | 0.172    | 0.041 | 2.42E-05 | 0.873 |
| rs4140646  | 6:27738801     | A  | G  | <i>LOC100131289</i> | 0.210       | 0.204       | 0.083               | 0.085  | 0.054 | 1.15E-01 | 0.106              | 0.028 | 1.88E-04 | 0.102    | 0.025 | 5.36E-05 | 0.731 |
| rs10756907 | 9:17727065     | G  | A  | <i>SH3GL2</i>       | 0.378       | 0.274       | 0.093               | 0.071  | 0.044 | 1.08E-01 | 0.083              | 0.023 | 3.41E-04 | 0.080    | 0.020 | 9.13E-05 | 0.808 |
| rs12528068 | 6:72487762     | T  | C  | <i>RIMS1</i>        | 0.074       | 0.252       | 0.066               | 0.177  | 0.076 | 1.97E-02 | 0.127              | 0.040 | 1.50E-03 | 0.138    | 0.035 | 9.67E-05 | 0.564 |
| rs4653767  | 1:226916078    | C  | T  | <i>ITPKB</i>        | 0.289       | 0.272       | -0.083              | -0.094 | 0.049 | 5.62E-02 | -0.084             | 0.025 | 9.75E-04 | -0.086   | 0.023 | 1.38E-04 | 0.848 |
| rs199351   | 7:23300049     | C  | A  | <i>GNMB</i>         | 0.339       | 0.383       | -0.102              | -0.052 | 0.047 | 2.73E-01 | -0.086             | 0.024 | 3.37E-04 | -0.079   | 0.021 | 2.17E-04 | 0.519 |
| rs1941685  | 18:31304318    | G  | T  | <i>ASXL3</i>        | 0.113       | 0.435       | -0.053              | -0.163 | 0.075 | 3.05E-02 | -0.109             | 0.038 | 3.64E-03 | -0.120   | 0.034 | 3.65E-04 | 0.522 |
| rs34025766 | 4:17968811     | A  | T  | <i>LCORL</i>        | 0.141       | 0.091       | -0.084              | -0.137 | 0.064 | 3.31E-02 | -0.091             | 0.034 | 6.66E-03 | -0.101   | 0.030 | 6.97E-04 | 0.525 |
| rs55818311 | 19:2341047     | T  | C  | <i>SPPL2B</i>       | 0.315       | 0.693       | -0.070              | -0.071 | 0.046 | 1.22E-01 | -0.068             | 0.024 | 4.28E-03 | -0.069   | 0.021 | 1.16E-03 | 0.950 |
| rs6500328  | 16:50736656    | G  | A  | <i>NOD2</i>         | 0.185       | 0.413       | -0.059              | -0.113 | 0.057 | 4.53E-02 | -0.075             | 0.029 | 9.18E-03 | -0.083   | 0.026 | 1.24E-03 | 0.548 |
| rs11150601 | 16:30977799    | G  | A  | <i>SETD1A</i>       | 0.083       | 0.331       | -0.091              | -0.189 | 0.085 | 2.59E-02 | -0.109             | 0.044 | 1.30E-02 | -0.126   | 0.039 | 1.25E-03 | 0.402 |
| rs2904880  | 16:28944396    | C  | G  | <i>CD19</i>         | 0.084       | 0.316       | -0.065              | -0.059 | 0.079 | 4.61E-01 | -0.130             | 0.041 | 1.39E-03 | -0.115   | 0.036 | 1.47E-03 | 0.423 |



|            |              |   |   |                     |       |       |        |        |       |          |        |       |          |        |       |          |       |
|------------|--------------|---|---|---------------------|-------|-------|--------|--------|-------|----------|--------|-------|----------|--------|-------|----------|-------|
| rs75859381 | 6:133210361  | C | T | <i>RPS12</i>        | 0.035 | 0.039 | 0.221  | -0.074 | 0.118 | 5.31E-01 | 0.230  | 0.060 | 1.09E-04 | 0.168  | 0.053 | 1.54E-03 | 0.021 |
| rs11578699 | 1:171719769  | T | C | <i>VAMP4</i>        | 0.176 | 0.161 | -0.070 | -0.041 | 0.062 | 5.13E-01 | -0.089 | 0.030 | 2.99E-03 | -0.080 | 0.027 | 3.03E-03 | 0.490 |
| rs2042477  | 2:96000943   | A | T | <i>KCNIP3</i>       | 0.442 | 0.234 | -0.066 | -0.106 | 0.044 | 1.60E-02 | -0.047 | 0.023 | 3.66E-02 | -0.060 | 0.020 | 3.09E-03 | 0.235 |
| rs11610045 | 12:133063768 | A | G | <i>FBRSL1</i>       | 0.133 | 0.491 | 0.060  | 0.096  | 0.067 | 1.54E-01 | 0.087  | 0.034 | 1.09E-02 | 0.089  | 0.030 | 3.54E-03 | 0.902 |
| rs620513   | 8:16697593   | T | G | <i>FGF20</i>        | 0.430 | 0.328 | -0.086 | -0.002 | 0.044 | 9.70E-01 | -0.072 | 0.023 | 1.76E-03 | -0.057 | 0.020 | 5.18E-03 | 0.161 |
| rs10797576 | 1:232664611  | T | C | <i>SIPAIL2</i>      | 0.142 | 0.100 | 0.111  | 0.011  | 0.060 | 8.57E-01 | 0.098  | 0.032 | 2.27E-03 | 0.079  | 0.028 | 5.41E-03 | 0.201 |
| rs12147950 | 14:37989270  | T | C | <i>MIPOL1</i>       | 0.490 | 0.393 | -0.053 | -0.097 | 0.043 | 2.58E-02 | -0.045 | 0.023 | 4.84E-02 | -0.056 | 0.020 | 5.44E-03 | 0.286 |
| rs1450522  | 3:161077630  | A | G | <i>SPTSSB</i>       | 0.464 | 0.689 | -0.062 | -0.073 | 0.044 | 1.00E-01 | -0.050 | 0.023 | 2.92E-02 | -0.054 | 0.020 | 7.05E-03 | 0.639 |
| rs2269906  | 17:42294337  | A | C | <i>UBTF</i>         | 0.222 | 0.713 | 0.063  | -0.020 | 0.051 | 6.99E-01 | 0.079  | 0.027 | 3.20E-03 | 0.058  | 0.024 | 1.48E-02 | 0.088 |
| rs3104783  | 16:52636242  | C | A | <i>CASC16</i>       | 0.222 | 0.643 | -0.067 | -0.065 | 0.054 | 2.29E-01 | -0.058 | 0.028 | 3.88E-02 | -0.060 | 0.025 | 1.69E-02 | 0.912 |
| rs12951632 | 17:40741013  | C | T | <i>RETREG3</i>      | 0.430 | 0.238 | -0.064 | -0.022 | 0.044 | 6.14E-01 | -0.054 | 0.023 | 1.68E-02 | -0.047 | 0.020 | 1.87E-02 | 0.516 |
| rs6808178  | 3:28705690   | T | C | <i>LINC00693</i>    | 0.197 | 0.425 | 0.066  | 0.025  | 0.056 | 6.59E-01 | 0.068  | 0.029 | 1.77E-02 | 0.059  | 0.025 | 2.06E-02 | 0.490 |
| rs62333164 | 4:170583157  | A | G | <i>CLCN3</i>        | 0.072 | 0.304 | -0.064 | -0.041 | 0.088 | 6.43E-01 | -0.106 | 0.046 | 2.12E-02 | -0.092 | 0.041 | 2.41E-02 | 0.514 |
| rs7134559  | 12:46419086  | C | T | <i>SCAF11</i>       | 0.410 | 0.578 | 0.054  | 0.053  | 0.044 | 2.28E-01 | 0.043  | 0.023 | 6.16E-02 | 0.045  | 0.020 | 2.68E-02 | 0.836 |
| rs3802920  | 11:133787001 | T | G | <i>IGSF9B</i>       | 0.160 | 0.087 | 0.107  | 0.018  | 0.063 | 7.80E-01 | 0.075  | 0.032 | 1.98E-02 | 0.063  | 0.029 | 2.79E-02 | 0.417 |
| rs6658353  | 1:161469054  | C | G | <i>FCGR2A</i>       | 0.283 | 0.505 | 0.065  | 0.008  | 0.049 | 8.76E-01 | 0.059  | 0.025 | 1.88E-02 | 0.048  | 0.022 | 3.04E-02 | 0.348 |
| rs61169879 | 17:59917366  | C | T | <i>BRIP1</i>        | 0.447 | 0.731 | -0.082 | -0.039 | 0.044 | 3.71E-01 | -0.043 | 0.023 | 6.05E-02 | -0.042 | 0.020 | 3.77E-02 | 0.942 |
| rs10221156 | 16:52969426  | A | G | <i>CHD9</i>         | 0.037 | 0.094 | -0.116 | 0.037  | 0.126 | 7.71E-01 | -0.154 | 0.063 | 1.39E-02 | -0.117 | 0.056 | 3.79E-02 | 0.177 |
| rs11683001 | 2:102396963  | A | T | <i>MAP4K4</i>       | 0.497 | 0.285 | 0.071  | 0.068  | 0.044 | 1.16E-01 | 0.033  | 0.022 | 1.38E-01 | 0.041  | 0.020 | 4.13E-02 | 0.474 |
| rs9638616  | 7:70750493   | T | G | <i>WBSCR17</i>      | 0.472 | 0.376 | 0.131  | 0.025  | 0.043 | 5.65E-01 | 0.045  | 0.023 | 5.13E-02 | 0.040  | 0.020 | 4.72E-02 | 0.681 |
| rs11950533 | 5:134199105  | A | C | <i>C5orf24</i>      | 0.263 | 0.194 | -0.092 | -0.019 | 0.049 | 7.05E-01 | -0.050 | 0.025 | 4.57E-02 | -0.043 | 0.022 | 5.05E-02 | 0.572 |
| rs9568188  | 13:49927732  | T | C | <i>CAB39L</i>       | 0.371 | 0.668 | 0.062  | 0.051  | 0.046 | 2.75E-01 | 0.036  | 0.023 | 1.15E-01 | 0.039  | 0.021 | 5.82E-02 | 0.777 |
| rs55961674 | 3:122196892  | T | C | <i>KPNA1</i>        | 0.122 | 0.096 | 0.086  | -0.013 | 0.068 | 8.53E-01 | 0.073  | 0.034 | 3.30E-02 | 0.056  | 0.031 | 6.85E-02 | 0.260 |
| rs12600861 | 17:7355621   | C | A | <i>CHRN1</i>        | 0.207 | 0.437 | 0.057  | 0.067  | 0.051 | 1.84E-01 | 0.034  | 0.026 | 1.92E-01 | 0.041  | 0.023 | 7.68E-02 | 0.560 |
| rs11658976 | 17:44866805  | A | G | <i>WNT3</i>         | 0.388 | 0.580 | -0.062 | 0.054  | 0.044 | 2.20E-01 | 0.028  | 0.023 | 2.30E-01 | 0.033  | 0.021 | 1.04E-01 | 0.591 |
| rs12283611 | 11:83487277  | A | C | <i>DLG2</i>         | 0.235 | 0.462 | -0.065 | -0.078 | 0.050 | 1.17E-01 | -0.024 | 0.026 | 3.45E-01 | -0.035 | 0.023 | 1.21E-01 | 0.334 |
| rs896435   | 10:15557406  | T | C | <i>ITGA8</i>        | 0.428 | 0.584 | 0.074  | -0.036 | 0.044 | 4.11E-01 | 0.048  | 0.023 | 3.35E-02 | 0.030  | 0.020 | 1.32E-01 | 0.087 |
| rs13294100 | 9:17579690   | G | T | <i>SH3GL2</i>       | 0.464 | 0.641 | 0.086  | -0.006 | 0.044 | 8.94E-01 | 0.038  | 0.022 | 8.56E-02 | 0.029  | 0.020 | 1.43E-01 | 0.369 |
| rs57891859 | 2:135464616  | A | G | <i>TMEM163</i>      | 0.245 | 0.732 | 0.081  | -0.014 | 0.051 | 7.89E-01 | 0.045  | 0.026 | 8.01E-02 | 0.033  | 0.023 | 1.47E-01 | 0.306 |
| rs4771268  | 13:97865021  | T | C | <i>MBNL2</i>        | 0.378 | 0.216 | 0.068  | 0.088  | 0.044 | 4.71E-02 | 0.010  | 0.023 | 6.49E-01 | 0.027  | 0.020 | 1.90E-01 | 0.119 |
| rs6854006  | 4:77198054   | T | C | <i>FAM47E-STBD1</i> | 0.081 | 0.344 | -0.091 | 0.128  | 0.076 | 9.12E-02 | 0.023  | 0.039 | 5.50E-01 | 0.045  | 0.035 | 1.93E-01 | 0.219 |
| rs2086641  | 8:130901909  | T | C | <i>FAM49B</i>       | 0.491 | 0.825 | -0.061 | -0.084 | 0.043 | 5.09E-02 | -0.007 | 0.023 | 7.60E-01 | -0.024 | 0.020 | 2.40E-01 | 0.112 |
| rs979812   | 14:88464264  | G | T | <i>GALC</i>         | 0.327 | 0.587 | -0.061 | 0.036  | 0.046 | 4.33E-01 | -0.037 | 0.024 | 1.23E-01 | -0.021 | 0.021 | 3.15E-01 | 0.160 |
| rs6476434  | 9:34046391   | C | T | <i>UBAP2</i>        | 0.163 | 0.253 | 0.062  | 0.019  | 0.060 | 7.52E-01 | 0.029  | 0.031 | 3.50E-01 | 0.027  | 0.027 | 3.29E-01 | 0.888 |
| rs850738   | 17:42434630  | G | A | <i>FAM171A2</i>     | 0.470 | 0.443 | 0.071  | -0.048 | 0.044 | 2.77E-01 | 0.035  | 0.022 | 1.17E-01 | 0.018  | 0.020 | 3.67E-01 | 0.092 |
| rs2280104  | 8:22525980   | T | C | <i>BIN3</i>         | 0.173 | 0.307 | 0.056  | 0.065  | 0.055 | 2.37E-01 | 0.011  | 0.029 | 6.91E-01 | 0.023  | 0.025 | 3.68E-01 | 0.387 |

|            |             |   |   |                     |       |       |        |        |       |          |        |       |          |        |       |          |       |
|------------|-------------|---|---|---------------------|-------|-------|--------|--------|-------|----------|--------|-------|----------|--------|-------|----------|-------|
| rs12497850 | 3:48748989  | G | T | <i>IP6K2</i>        | 0.032 | 0.339 | -0.064 | -0.053 | 0.111 | 6.33E-01 | -0.041 | 0.054 | 4.50E-01 | -0.043 | 0.049 | 3.74E-01 | 0.922 |
| rs13117519 | 4:114369065 | T | C | <i>CAMK2D</i>       | 0.090 | 0.110 | 0.088  | 0.031  | 0.079 | 6.94E-01 | 0.031  | 0.040 | 4.40E-01 | 0.031  | 0.035 | 3.86E-01 | 0.995 |
| rs246814   | 5:75599208  | T | C | <i>SV2C</i>         | 0.084 | 0.116 | 0.215  | -0.144 | 0.074 | 5.18E-02 | 0.077  | 0.041 | 6.24E-02 | 0.025  | 0.036 | 4.94E-01 | 0.009 |
| rs6497339  | 16:19277493 | A | T | <i>SYT17</i>        | 0.014 | 0.402 | 0.063  | -0.259 | 0.261 | 3.22E-01 | 0.141  | 0.129 | 2.71E-01 | 0.063  | 0.115 | 5.83E-01 | 0.169 |
| rs4101061  | 4:77147969  | A | G | <i>FAM47E</i>       | 0.224 | 0.685 | -0.091 | 0.020  | 0.052 | 6.99E-01 | -0.022 | 0.027 | 4.17E-01 | -0.013 | 0.024 | 5.83E-01 | 0.476 |
| rs76949143 | 7:66009851  | A | T | <i>GSI-124K5.11</i> | 0.155 | 0.154 | -0.143 | -0.102 | 0.065 | 1.17E-01 | 0.011  | 0.031 | 7.34E-01 | -0.010 | 0.028 | 7.11E-01 | 0.118 |
| rs3742785  | 14:75373034 | C | A | <i>RPS6KL1</i>      | 0.219 | 0.280 | -0.071 | 0.096  | 0.058 | 9.85E-02 | -0.012 | 0.027 | 6.58E-01 | 0.008  | 0.025 | 7.61E-01 | 0.092 |
| rs76904798 | 12:40614434 | T | C | <i>LRRK2</i>        | 0.046 | 0.083 | 0.144  | 0.104  | 0.099 | 2.93E-01 | -0.011 | 0.051 | 8.37E-01 | 0.014  | 0.046 | 7.64E-01 | 0.304 |
| rs666463   | 17:76425480 | T | A | <i>DNAH17</i>       | 0.039 | 0.108 | -0.076 | 0.057  | 0.122 | 6.40E-01 | -0.029 | 0.067 | 6.65E-01 | -0.009 | 0.059 | 8.76E-01 | 0.537 |
| rs11707416 | 3:151108965 | A | T | <i>MED12L</i>       | 0.135 | 0.403 | -0.063 | 0.112  | 0.061 | 6.50E-02 | -0.035 | 0.032 | 2.69E-01 | -0.003 | 0.028 | 9.04E-01 | 0.032 |
| rs26431    | 5:102365794 | G | C | <i>PAM</i>          | 0.447 | 0.325 | -0.062 | -0.109 | 0.045 | 1.46E-02 | 0.029  | 0.023 | 1.97E-01 | 0.001  | 0.020 | 9.60E-01 | 0.006 |
| rs8087969  | 18:48683589 | G | T | <i>MEX3C</i>        | 0.276 | 0.428 | 0.058  | -0.059 | 0.048 | 2.23E-01 | 0.016  | 0.025 | 5.23E-01 | 0.0003 | 0.022 | 9.88E-01 | 0.169 |

\*, conditioned on rs11557080 which was located within the same risk locus; EA, effect allele; OA, other allele; MAF, minor allele frequency; EUR, European; EAS, East Asian; Beta, regression coefficient; Se, standard error of beta; Phet, the *P*-value of heterogeneity; MAF data was extracted from gnomAD database and reported beta was extracted from studies of European population (Nalls, 2019) and East Asian population (Foo, 2020).

**Supplementary Table 9. Genetic correlation between Parkinson's disease and other phenotypes in East Asian population**

| Trait                                | Genetic correlation, $r_g$ | Se, $r_g$ | Z, $r_g$ | P, $r_g$ | Observed $H^2$ | Se, $H^2$ | $H^2$ , intercept | Se, $H^2$ , intercept | Cross trait intercept | Se, Cross trait intercept | Source       |
|--------------------------------------|----------------------------|-----------|----------|----------|----------------|-----------|-------------------|-----------------------|-----------------------|---------------------------|--------------|
| Height                               | 0.129                      | 0.058     | 2.211    | 0.027    | 0.442          | 0.023     | 1.150             | 0.028                 | -0.0031               | 0.0061                    | BBJ          |
| Type 2 Diabetes2                     | -0.142                     | 0.067     | -2.133   | 0.033    | 0.077          | 0.006     | 1.018             | 0.033                 | 0.001                 | 0.0051                    | BBJ-2020     |
| Systemic lupus erythematosus         | 0.353                      | 0.167     | 2.110    | 0.035    | 0.332          | 0.098     | 1.075             | 0.016                 | -0.0141               | 0.0064                    | GWAS catalog |
| Rheumatoid arthritis2                | 0.171                      | 0.082     | 2.080    | 0.038    | 0.047          | 0.012     | 0.953             | 0.024                 | -0.0079               | 0.0045                    | GWAS catalog |
| G glutamyl transferase               | 0.192                      | 0.093     | 2.076    | 0.038    | 0.113          | 0.028     | 1.032             | 0.027                 | -0.0075               | 0.0051                    | BBJ          |
| Cheese consumption                   | 0.306                      | 0.159     | 1.929    | 0.054    | 0.022          | 0.003     | 0.998             | 0.008                 | 0.0036                | 0.0051                    | GWAS catalog |
| Rheumatoid arthritis                 | 0.262                      | 0.138     | 1.900    | 0.057    | 0.021          | 0.008     | 0.994             | 0.014                 | -0.0038               | 0.0049                    | BBJ          |
| Hematocrit                           | -0.209                     | 0.114     | -1.829   | 0.067    | 0.072          | 0.008     | 1.038             | 0.011                 | 0.0114                | 0.0052                    | BBJ          |
| Vegetable consumption                | -0.350                     | 0.192     | -1.823   | 0.068    | 0.017          | 0.003     | 0.999             | 0.008                 | 0.0044                | 0.005                     | GWAS catalog |
| Urolithiasis                         | -0.245                     | 0.136     | -1.805   | 0.071    | 0.018          | 0.003     | 1.001             | 0.009                 | 0.0076                | 0.0045                    | BBJ          |
| Hemoglobin                           | -0.200                     | 0.119     | -1.681   | 0.093    | 0.067          | 0.007     | 1.037             | 0.010                 | 0.0104                | 0.0055                    | BBJ          |
| Epithelial ovarian cancer            | -0.559                     | 0.337     | -1.660   | 0.097    | 0.121          | 0.059     | 1.031             | 0.006                 | 0.0177                | 0.0045                    | GWAS catalog |
| Red blood cell count                 | -0.150                     | 0.096     | -1.558   | 0.119    | 0.118          | 0.014     | 1.050             | 0.014                 | 0.009                 | 0.0055                    | BBJ          |
| Graves' disease                      | 0.236                      | 0.152     | 1.552    | 0.121    | 0.018          | 0.006     | 0.981             | 0.011                 | 0.0015                | 0.0051                    | BBJ          |
| Epilepsy                             | -0.602                     | 0.405     | -1.484   | 0.138    | 0.003          | 0.002     | 0.994             | 0.007                 | 0.0038                | 0.0049                    | BBJ          |
| Estimated glomerular filtration rate | -0.128                     | 0.093     | -1.388   | 0.165    | 0.099          | 0.009     | 1.092             | 0.013                 | 0.0065                | 0.0058                    | BBJ          |
| Yogurt consumption                   | 0.178                      | 0.129     | 1.382    | 0.167    | 0.032          | 0.004     | 0.999             | 0.008                 | -4.72E-05             | 0.0048                    | GWAS catalog |
| Peripheral artery disease            | -0.216                     | 0.157     | -1.380   | 0.168    | 0.016          | 0.003     | 0.979             | 0.008                 | 0.0028                | 0.0045                    | BBJ          |
| Basophil count                       | 0.188                      | 0.140     | 1.347    | 0.178    | 0.068          | 0.017     | 1.079             | 0.011                 | -0.0017               | 0.005                     | BBJ          |
| Breast cancer                        | -0.236                     | 0.178     | -1.328   | 0.184    | 0.030          | 0.006     | 0.977             | 0.008                 | 0.0031                | 0.0052                    | BBJ          |
| Tofu consumption                     | -0.229                     | 0.173     | -1.321   | 0.186    | 0.024          | 0.004     | 0.999             | 0.008                 | 0.0094                | 0.0052                    | GWAS catalog |
| Aspartate aminotransferase           | 0.141                      | 0.107     | 1.318    | 0.188    | 0.069          | 0.009     | 1.015             | 0.012                 | -0.0097               | 0.005                     | BBJ          |

|                                                                |                |       |        |       |       |       |       |       |         |        |              |
|----------------------------------------------------------------|----------------|-------|--------|-------|-------|-------|-------|-------|---------|--------|--------------|
| Total bilirubin                                                | 0.166          | 0.129 | 1.287  | 0.198 | 0.059 | 0.019 | 1.038 | 0.017 | -0.0067 | 0.0051 | BBJ          |
| Gut microbiome-Faecalibacterium                                | -0.370         | 0.288 | -1.283 | 0.200 | 0.837 | 0.398 | 0.992 | 0.006 | 0.0088  | 0.0043 | GWAS catalog |
| Gastric cancer                                                 | -0.212         | 0.169 | -1.252 | 0.211 | 0.012 | 0.003 | 0.996 | 0.007 | 0.0046  | 0.0048 | BBJ          |
| Fish intake frequency                                          | -0.164         | 0.133 | -1.229 | 0.219 | 0.034 | 0.008 | 0.994 | 0.009 | 0.0104  | 0.0048 | BBJ          |
| smoking initiation                                             | -0.124         | 0.101 | -1.226 | 0.220 | 0.053 | 0.004 | 1.002 | 0.008 | 0.0034  | 0.0053 | BBJ          |
| Monocyte count                                                 | -0.147         | 0.123 | -1.195 | 0.232 | 0.088 | 0.013 | 1.056 | 0.011 | 0.0021  | 0.0049 | BBJ          |
| Type 2 Diabetes1                                               | -0.088         | 0.078 | -1.142 | 0.254 | 0.105 | 0.009 | 1.043 | 0.028 | 0.0015  | 0.0054 | BBJ-2019     |
| Serum creatinine                                               | 0.100          | 0.089 | 1.115  | 0.265 | 0.103 | 0.009 | 1.078 | 0.014 | -0.0061 | 0.0058 | BBJ          |
| Natto consumption                                              | -0.144         | 0.129 | -1.112 | 0.266 | 0.032 | 0.005 | 1.003 | 0.008 | 0.0039  | 0.0045 | GWAS catalog |
| Smoking cessation                                              | 0.173          | 0.161 | 1.071  | 0.284 | 0.035 | 0.007 | 1.001 | 0.007 | 0.0008  | 0.0045 | BBJ          |
| Disc area                                                      | -0.305         | 0.288 | -1.061 | 0.289 | 0.150 | 0.074 | 1.003 | 0.007 | -0.0013 | 0.0045 | GWAS catalog |
| Chronic obstructive pulmonary disease                          | -0.155         | 0.148 | -1.050 | 0.294 | 0.012 | 0.003 | 0.987 | 0.008 | 0.0025  | 0.0046 | BBJ          |
| Glaucoma                                                       | 0.154          | 0.148 | 1.046  | 0.296 | 0.014 | 0.002 | 1.001 | 0.007 | -0.0063 | 0.0047 | BBJ-2020     |
| Chronic hepatitis B                                            | -0.222         | 0.213 | -1.041 | 0.298 | 0.008 | 0.004 | 0.985 | 0.008 | -0.0015 | 0.0049 | BBJ          |
| Glaucoma2                                                      | 0.128          | 0.125 | 1.026  | 0.305 | 0.114 | 0.013 | 0.986 | 0.007 | -0.0042 | 0.0047 | GWAS catalog |
| Alanine aminotransferase                                       | 0.122          | 0.120 | 1.023  | 0.306 | 0.063 | 0.009 | 1.014 | 0.010 | -0.0023 | 0.005  | BBJ          |
| Interventricular septum thickness                              | 0.256          | 0.252 | 1.016  | 0.310 | 0.054 | 0.025 | 1.022 | 0.007 | -0.0073 | 0.005  | BBJ          |
| Drug eruption                                                  | 0.500          | 0.495 | 1.010  | 0.312 | 0.002 | 0.002 | 0.985 | 0.008 | -0.004  | 0.0049 | BBJ          |
| Hemoglobin concentration                                       | -0.099         | 0.101 | -0.988 | 0.323 | 0.067 | 0.006 | 1.065 | 0.010 | 0.0059  | 0.0046 | GWAS catalog |
| Platelet count                                                 | -0.078         | 0.080 | -0.973 | 0.331 | 0.158 | 0.026 | 1.054 | 0.023 | 0.0011  | 0.0053 | BBJ          |
| Cigarettes per day                                             | 0.140          | 0.146 | 0.958  | 0.338 | 0.071 | 0.011 | 1.012 | 0.014 | -0.0028 | 0.0051 | BBJ          |
| Blood urea nitrogen                                            | -0.098         | 0.102 | -0.956 | 0.339 | 0.074 | 0.008 | 1.061 | 0.010 | 0.0047  | 0.0051 | BBJ          |
| Non-albumin protein                                            | -0.107         | 0.114 | -0.935 | 0.350 | 0.095 | 0.011 | 1.089 | 0.026 | 0.0038  | 0.0056 | BBJ          |
| Gut microbiome-unassigned<br>belonging to family Clostridiales | genus<br>0.262 | 0.289 | 0.907  | 0.364 | 0.775 | 0.426 | 0.994 | 0.007 | -0.0008 | 0.0046 | GWAS catalog |
| Mean arterial pressure                                         | 0.087          | 0.096 | 0.907  | 0.365 | 0.073 | 0.008 | 1.050 | 0.010 | -0.0088 | 0.0051 | BBJ          |
| Neutrophil count                                               | -0.103         | 0.116 | -0.884 | 0.377 | 0.117 | 0.015 | 1.013 | 0.009 | 0.0029  | 0.0052 | BBJ          |

|                             |        |       |        |       |       |       |       |       |          |        |              |
|-----------------------------|--------|-------|--------|-------|-------|-------|-------|-------|----------|--------|--------------|
| Creatine kinase             | -0.086 | 0.098 | -0.880 | 0.379 | 0.095 | 0.011 | 1.056 | 0.039 | 0.0022   | 0.0045 | BBJ          |
| Relative wall thickness     | 0.175  | 0.201 | 0.867  | 0.386 | 0.083 | 0.027 | 1.010 | 0.008 | -0.0002  | 0.0045 | BBJ          |
| Lung cancer                 | 0.234  | 0.276 | 0.849  | 0.396 | 0.005 | 0.002 | 0.998 | 0.007 | -0.0038  | 0.0046 | BBJ          |
| Albumin/globulin ratio      | 0.091  | 0.108 | 0.847  | 0.397 | 0.092 | 0.011 | 1.067 | 0.021 | -0.0032  | 0.0051 | BBJ          |
| Gut microbiome-Sutterella   | 0.469  | 0.573 | 0.818  | 0.413 | 0.263 | 0.415 | 0.988 | 0.007 | -0.0047  | 0.0041 | GWAS catalog |
| Diastolic blood pressure    | 0.082  | 0.104 | 0.788  | 0.431 | 0.060 | 0.006 | 1.041 | 0.009 | -0.0086  | 0.0051 | BBJ          |
| Cataract                    | 0.166  | 0.215 | 0.773  | 0.439 | 0.007 | 0.002 | 1.052 | 0.008 | 0.0007   | 0.0054 | BBJ          |
| Systolic blood pressure     | 0.072  | 0.094 | 0.770  | 0.442 | 0.077 | 0.008 | 1.051 | 0.011 | -0.0071  | 0.0052 | BBJ          |
| Menopause                   | -0.095 | 0.126 | -0.751 | 0.453 | 0.115 | 0.018 | 0.990 | 0.008 | 0.008    | 0.0045 | BBJ          |
| Coronary artery disease     | 0.056  | 0.078 | 0.720  | 0.472 | 0.072 | 0.009 | 1.000 | 0.013 | -0.0021  | 0.005  | BBJ          |
| Alkaline phosphatase        | -0.074 | 0.104 | -0.712 | 0.477 | 0.090 | 0.024 | 1.105 | 0.033 | -0.0002  | 0.0052 | BBJ          |
| Lactate dehydrogenase       | 0.108  | 0.154 | 0.698  | 0.485 | 0.027 | 0.009 | 1.105 | 0.042 | 0.0028   | 0.0052 | BBJ          |
| Triglyceride                | -0.070 | 0.100 | -0.698 | 0.485 | 0.123 | 0.033 | 1.018 | 0.018 | 0.004    | 0.0053 | BBJ          |
| Cup area                    | 0.166  | 0.262 | 0.634  | 0.526 | 0.115 | 0.058 | 1.000 | 0.007 | 0.0023   | 0.0043 | GWAS catalog |
| Lymphocyte count            | -0.079 | 0.126 | -0.630 | 0.529 | 0.086 | 0.011 | 1.028 | 0.009 | 0.0062   | 0.0053 | BBJ          |
| White blood cell count      | -0.056 | 0.092 | -0.609 | 0.543 | 0.104 | 0.010 | 1.036 | 0.011 | 0.0042   | 0.0052 | BBJ          |
| Open-angle glaucoma         | 0.093  | 0.158 | 0.586  | 0.558 | 0.125 | 0.023 | 1.103 | 0.008 | -0.004   | 0.0049 | BBJ-2018     |
| Left ventricular mass       | 0.095  | 0.162 | 0.585  | 0.559 | 0.153 | 0.027 | 1.000 | 0.007 | -0.0079  | 0.0047 | BBJ          |
| Left ventricular mass index | 0.104  | 0.182 | 0.574  | 0.566 | 0.118 | 0.027 | 1.000 | 0.007 | -0.0084  | 0.0045 | BBJ          |
| Arrhythmia                  | 0.062  | 0.109 | 0.567  | 0.571 | 0.029 | 0.005 | 1.013 | 0.014 | -0.0028  | 0.0047 | BBJ          |
| Drinks per week             | 0.070  | 0.124 | 0.563  | 0.574 | 0.087 | 0.055 | 0.982 | 0.015 | -0.0027  | 0.005  | GWAS catalog |
| Age of smoking initiation   | 0.122  | 0.225 | 0.545  | 0.586 | 0.044 | 0.016 | 0.998 | 0.007 | 0.0013   | 0.0049 | BBJ          |
| Potassium                   | 0.059  | 0.112 | 0.522  | 0.601 | 0.054 | 0.007 | 1.018 | 0.011 | -0.0003  | 0.0048 | BBJ          |
| Mosaic loss of chromosome Y | 0.059  | 0.116 | 0.513  | 0.608 | 0.076 | 0.013 | 1.018 | 0.013 | -0.0027  | 0.0048 | BBJ          |
| Green tea consumption       | 0.089  | 0.175 | 0.511  | 0.610 | 0.019 | 0.004 | 1.001 | 0.008 | 1.36E-05 | 0.0054 | GWAS catalog |
| Osteoporosis                | 0.107  | 0.210 | 0.507  | 0.612 | 0.008 | 0.002 | 1.001 | 0.007 | -0.0073  | 0.005  | BBJ          |

|                                                 |        |       |        |       |       |       |       |       |         |        |              |
|-------------------------------------------------|--------|-------|--------|-------|-------|-------|-------|-------|---------|--------|--------------|
| Gut microbiome-Bifidobacterium                  | 0.737  | 1.454 | 0.507  | 0.612 | 0.158 | 0.419 | 0.993 | 0.007 | -0.0042 | 0.004  | GWAS catalog |
| Eosinophil count                                | -0.059 | 0.117 | -0.504 | 0.615 | 0.110 | 0.015 | 1.032 | 0.011 | 0.0047  | 0.005  | BBJ          |
| Endometrial cancer                              | -0.133 | 0.267 | -0.496 | 0.620 | 0.010 | 0.005 | 0.968 | 0.007 | -0.0009 | 0.0045 | BBJ          |
| Membranous nephropathy                          | 0.784  | 1.591 | 0.493  | 0.622 | 0.148 | 0.224 | 1.028 | 0.008 | -0.0161 | 0.0051 | GWAS catalog |
| Body mass index                                 | -0.037 | 0.077 | -0.477 | 0.633 | 0.170 | 0.008 | 1.066 | 0.014 | -0.0079 | 0.0055 | BBJ          |
| Small whole fish consumption                    | 0.070  | 0.151 | 0.461  | 0.645 | 0.029 | 0.004 | 1.000 | 0.008 | -0.0005 | 0.0049 | GWAS catalog |
| facial pigmentation measurement UV light        | 0.085  | 0.184 | 0.460  | 0.645 | 0.216 | 0.050 | 1.006 | 0.008 | -0.0026 | 0.0053 | GWAS catalog |
| Activated partial thromboplastin time           | -0.089 | 0.197 | -0.449 | 0.653 | 0.046 | 0.015 | 1.035 | 0.014 | -0.0044 | 0.0051 | BBJ          |
| Sodium                                          | 0.054  | 0.122 | 0.445  | 0.656 | 0.055 | 0.007 | 1.014 | 0.010 | -0.0023 | 0.0052 | BBJ          |
| Hemoglobin A1c                                  | -0.058 | 0.131 | -0.442 | 0.659 | 0.105 | 0.019 | 1.041 | 0.011 | -0.0019 | 0.0046 | BBJ          |
| Colorectal cancer                               | -0.077 | 0.174 | -0.439 | 0.661 | 0.080 | 0.016 | 1.211 | 0.008 | 0.0022  | 0.0049 | BBJ          |
| Phosphorus                                      | 0.081  | 0.187 | 0.434  | 0.665 | 0.048 | 0.012 | 1.024 | 0.009 | 0.0005  | 0.0046 | BBJ          |
| Total cholesterol                               | -0.048 | 0.111 | -0.433 | 0.665 | 0.051 | 0.012 | 1.069 | 0.028 | 0.0061  | 0.005  | BBJ          |
| Albumin                                         | 0.053  | 0.124 | 0.432  | 0.666 | 0.060 | 0.007 | 1.011 | 0.010 | -0.0015 | 0.005  | BBJ          |
| Prothrombin time                                | 0.075  | 0.176 | 0.423  | 0.672 | 0.056 | 0.024 | 1.040 | 0.032 | -0.0096 | 0.0052 | BBJ          |
| Posterior wall thickness                        | 0.069  | 0.173 | 0.396  | 0.692 | 0.104 | 0.024 | 1.003 | 0.007 | -0.0019 | 0.0045 | BBJ          |
| Cirrhosis                                       | 0.139  | 0.354 | 0.394  | 0.694 | 0.003 | 0.003 | 1.007 | 0.008 | 0.0012  | 0.0049 | BBJ          |
| Congestive heart failure                        | -0.072 | 0.186 | -0.390 | 0.697 | 0.011 | 0.002 | 1.014 | 0.007 | -0.0014 | 0.005  | BBJ          |
| Chloride                                        | 0.045  | 0.116 | 0.387  | 0.699 | 0.058 | 0.007 | 1.059 | 0.011 | 0.0005  | 0.0048 | BBJ          |
| Fractional shortening                           | -0.093 | 0.243 | -0.384 | 0.701 | 0.075 | 0.024 | 1.006 | 0.008 | 0.0061  | 0.0049 | BBJ          |
| Menarche                                        | -0.039 | 0.105 | -0.371 | 0.711 | 0.110 | 0.010 | 1.021 | 0.007 | 0.0005  | 0.0051 | BBJ          |
| Cervical cancer                                 | -0.092 | 0.248 | -0.370 | 0.711 | 0.015 | 0.006 | 0.986 | 0.008 | -0.003  | 0.0049 | BBJ          |
| Left ventricular internal dimension in diastole | -0.062 | 0.172 | -0.361 | 0.718 | 0.140 | 0.024 | 0.998 | 0.008 | -0.001  | 0.0045 | BBJ          |
| Gut microbiome-Dorea                            | -0.172 | 0.493 | -0.349 | 0.728 | 0.293 | 0.421 | 0.992 | 0.007 | -0.0066 | 0.0048 | GWAS catalog |
| Uric acid                                       | 0.027  | 0.079 | 0.348  | 0.728 | 0.159 | 0.052 | 0.996 | 0.024 | -0.0074 | 0.0054 | BBJ          |
| Nephrotic syndrome                              | -0.112 | 0.322 | -0.347 | 0.728 | 0.004 | 0.002 | 0.992 | 0.008 | 0.0011  | 0.0049 | BBJ          |

|                                                                 |        |       |        |       |       |       |       |       |           |        |              |
|-----------------------------------------------------------------|--------|-------|--------|-------|-------|-------|-------|-------|-----------|--------|--------------|
| Gut microbiome-Ruminococcus belonging to family Lachnospiraceae | -0.188 | 0.545 | -0.345 | 0.730 | 0.241 | 0.427 | 1.008 | 0.007 | 0.0074    | 0.0044 | GWAS catalog |
| Pulmonary tuberculosis                                          | -0.113 | 0.336 | -0.337 | 0.736 | 0.003 | 0.002 | 0.992 | 0.007 | -0.0023   | 0.0048 | BBJ          |
| Coffee consumption                                              | 0.035  | 0.105 | 0.330  | 0.741 | 0.063 | 0.016 | 0.980 | 0.013 | 0.0025    | 0.0048 | GWAS catalog |
| Keloid                                                          | 0.067  | 0.212 | 0.317  | 0.751 | 0.007 | 0.002 | 0.979 | 0.007 | -0.0013   | 0.0051 | BBJ          |
| Pulse pressure                                                  | 0.034  | 0.110 | 0.307  | 0.759 | 0.053 | 0.005 | 1.035 | 0.009 | -0.0004   | 0.0052 | BBJ          |
| Pollinosis                                                      | -0.063 | 0.217 | -0.291 | 0.771 | 0.007 | 0.002 | 1.000 | 0.008 | 0.0023    | 0.0048 | BBJ          |
| Total protein                                                   | -0.029 | 0.120 | -0.242 | 0.809 | 0.078 | 0.008 | 1.069 | 0.018 | -0.0001   | 0.0056 | BBJ          |
| Hematological malignancy                                        | -0.226 | 0.983 | -0.230 | 0.818 | 0.001 | 0.002 | 0.986 | 0.007 | 0.0067    | 0.005  | BBJ          |
| Atrial Fibrillation                                             | 0.029  | 0.128 | 0.223  | 0.824 | 0.132 | 0.025 | 1.218 | 0.013 | -0.0046   | 0.0053 | BBJ          |
| Facia pigmentation polar light                                  | -0.039 | 0.180 | -0.215 | 0.830 | 0.143 | 0.030 | 1.003 | 0.007 | -0.003    | 0.0049 | GWAS catalog |
| Esophageal cancer                                               | -0.033 | 0.163 | -0.205 | 0.838 | 0.013 | 0.005 | 0.957 | 0.009 | 0.0004    | 0.0046 | BBJ          |
| Mean corpuscular hemoglobin                                     | -0.016 | 0.079 | -0.201 | 0.841 | 0.158 | 0.025 | 1.045 | 0.021 | 0.0041    | 0.0056 | BBJ          |
| C-reactive protein                                              | -0.048 | 0.242 | -0.200 | 0.842 | 0.019 | 0.009 | 1.177 | 0.012 | -0.0055   | 0.0049 | BBJ          |
| Atopic dermatitis                                               | 0.029  | 0.154 | 0.190  | 0.849 | 0.012 | 0.003 | 0.975 | 0.008 | 0.0015    | 0.0048 | BBJ          |
| Gut microbiome-Parabacteroides                                  | -0.053 | 0.285 | -0.186 | 0.853 | 0.735 | 0.418 | 0.982 | 0.007 | -0.0002   | 0.0048 | GWAS catalog |
| Milk consumption                                                | 0.021  | 0.116 | 0.181  | 0.857 | 0.036 | 0.004 | 0.998 | 0.008 | 0.0061    | 0.0054 | GWAS catalog |
| High-density-lipoprotein cholesterol                            | 0.020  | 0.110 | 0.180  | 0.857 | 0.107 | 0.038 | 1.120 | 0.060 | -0.0019   | 0.0053 | BBJ          |
| Blood sugar                                                     | -0.021 | 0.122 | -0.175 | 0.861 | 0.050 | 0.009 | 1.019 | 0.010 | -6.36E-05 | 0.0048 | BBJ          |
| Sweet taste preference                                          | 0.029  | 0.178 | 0.166  | 0.869 | 0.231 | 0.106 | 0.987 | 0.012 | -0.0028   | 0.0062 | GWAS catalog |
| Calcium                                                         | -0.026 | 0.162 | -0.160 | 0.873 | 0.050 | 0.010 | 1.011 | 0.009 | -0.0011   | 0.0052 | BBJ          |
| Ejection fraction                                               | -0.037 | 0.236 | -0.156 | 0.876 | 0.079 | 0.026 | 1.002 | 0.008 | 0.004     | 0.0048 | BBJ          |
| Mean corpuscular hemoglobin concentration                       | -0.020 | 0.134 | -0.148 | 0.883 | 0.053 | 0.010 | 1.055 | 0.014 | 0.0009    | 0.0058 | BBJ          |
| Meat consumption                                                | -0.022 | 0.153 | -0.145 | 0.885 | 0.023 | 0.004 | 1.001 | 0.008 | -2.52E-05 | 0.0047 | GWAS catalog |
| Chronic hepatitis C                                             | -0.029 | 0.207 | -0.142 | 0.887 | 0.008 | 0.003 | 0.996 | 0.007 | 0.0039    | 0.005  | BBJ          |
| Cerebral aneurysm                                               | 0.023  | 0.167 | 0.137  | 0.891 | 0.015 | 0.003 | 0.988 | 0.008 | -0.0068   | 0.0047 | BBJ          |

|                                                                      |        |       |        |       |        |       |       |       |         |        |              |
|----------------------------------------------------------------------|--------|-------|--------|-------|--------|-------|-------|-------|---------|--------|--------------|
| Ovarian cancer                                                       | -0.045 | 0.462 | -0.097 | 0.923 | 0.003  | 0.004 | 0.970 | 0.007 | -0.007  | 0.0048 | BBJ          |
| Central corneal thickness                                            | 0.016  | 0.167 | 0.096  | 0.923 | 0.272  | 0.060 | 1.000 | 0.008 | 0.003   | 0.0047 | GWAS catalog |
| hepatocellular carcinoma                                             | -0.027 | 0.309 | -0.089 | 0.929 | 0.004  | 0.003 | 0.992 | 0.007 | -0.0048 | 0.0043 | BBJ          |
| Fibrinogen                                                           | -0.031 | 0.353 | -0.086 | 0.931 | 0.026  | 0.024 | 1.006 | 0.007 | 0.0003  | 0.0048 | BBJ          |
| Prostate cancer                                                      | -0.008 | 0.127 | -0.065 | 0.948 | 0.045  | 0.007 | 0.978 | 0.021 | -0.0035 | 0.0048 | BBJ          |
| Left ventricular internal dimension in systole                       | 0.011  | 0.174 | 0.063  | 0.950 | 0.144  | 0.026 | 0.998 | 0.007 | -0.005  | 0.0046 | BBJ          |
| Mean corpuscular volume                                              | 0.005  | 0.077 | 0.058  | 0.954 | 0.178  | 0.026 | 1.053 | 0.021 | 0.0032  | 0.0054 | BBJ          |
| Low-density-lipoprotein cholesterol                                  | 0.005  | 0.148 | 0.037  | 0.971 | 0.055  | 0.021 | 1.056 | 0.034 | -0.0004 | 0.0049 | BBJ          |
| Ischemic stroke                                                      | 0.004  | 0.142 | 0.030  | 0.976 | 0.016  | 0.003 | 1.021 | 0.008 | -0.0017 | 0.0049 | BBJ          |
| Gut microbiome-unassigned belonging to family Lachnospiraceae genus  | -0.008 | 0.340 | -0.023 | 0.982 | 0.563  | 0.430 | 0.996 | 0.008 | 0.0007  | 0.0048 | GWAS catalog |
| Zinc sulfate turbidity test                                          | 0.003  | 0.255 | 0.010  | 0.992 | 0.082  | 0.041 | 1.023 | 0.009 | -0.0023 | 0.0048 | BBJ          |
| Asthma                                                               | -0.001 | 0.142 | -0.004 | 0.997 | 0.023  | 0.003 | 1.005 | 0.009 | 0.0001  | 0.0052 | BBJ          |
| Biliary tract cancer                                                 | NA     | NA    | NA     | NA    | -0.004 | 0.002 | 1.003 | 0.007 | 0.0007  | 0.0049 | BBJ          |
| E/A ratio                                                            | NA     | NA    | NA     | NA    | NA     | NA    | NA    | NA    | NA      | NA     | BBJ          |
| Endometriosis                                                        | NA     | NA    | NA     | NA    | -0.002 | 0.004 | 0.986 | 0.007 | 0.0013  | 0.0045 | BBJ          |
| Gut microbiome-Bacteroides                                           | NA     | NA    | NA     | NA    | -0.459 | 0.399 | 1.006 | 0.006 | -0.006  | 0.0047 | GWAS catalog |
| Gut microbiome-Blautia                                               | NA     | NA    | NA     | NA    | -0.302 | 0.407 | 1.002 | 0.007 | -0.0041 | 0.0049 | GWAS catalog |
| Gut microbiome-Coprococcus                                           | NA     | NA    | NA     | NA    | NA     | NA    | NA    | NA    | NA      | NA     | GWAS catalog |
| Gut microbiome-Eubacterium belonging to family Erysipelotrichaceae   | NA     | NA    | NA     | NA    | -0.225 | 0.391 | 1.002 | 0.007 | -0.0102 | 0.0043 | GWAS catalog |
| Gut microbiome-Oscillospira                                          | NA     | NA    | NA     | NA    | -0.567 | 0.398 | 1.013 | 0.007 | 0.0026  | 0.0047 | GWAS catalog |
| Gut microbiome-Prevotella                                            | NA     | NA    | NA     | NA    | -0.607 | 0.382 | 1.004 | 0.007 | 0.0031  | 0.0045 | GWAS catalog |
| Gut microbiome-Ruminococcus belonging to family Erysipelotrichaceae  | NA     | NA    | NA     | NA    | NA     | NA    | NA    | NA    | NA      | NA     | GWAS catalog |
| Gut microbiome-Streptococcus                                         | NA     | NA    | NA     | NA    | -0.734 | 0.412 | 1.011 | 0.006 | -0.0012 | 0.0044 | GWAS catalog |
| Gut microbiome-unclassified belonging to family Clostridiaceae genus | NA     | NA    | NA     | NA    | -0.715 | 0.404 | 1.008 | 0.007 | 0.005   | 0.0046 | GWAS catalog |



|                                                                           |    |    |    |    |        |       |       |       |         |        |    |              |
|---------------------------------------------------------------------------|----|----|----|----|--------|-------|-------|-------|---------|--------|----|--------------|
| Gut microbiome-unclassified genus belonging to family Erysipelotrichaceae | NA | NA | NA | NA | NA     | NA    | NA    | NA    | NA      | NA     | NA | GWAS catalog |
| Gut microbiome-unclassified genus belonging to family Lachnospiraceae     | NA | NA | NA | NA | -0.100 | 0.397 | 1.008 | 0.007 | 0.0002  | 0.0051 |    | GWAS catalog |
| Gut microbiome-unclassified genus belonging to family Ruminococcaceae     | NA | NA | NA | NA | NA     | NA    | NA    | NA    | NA      | NA     |    | GWAS catalog |
| Gut microbiome-unclassified genus belonging to the order Clostridiales    | NA | NA | NA | NA | NA     | NA    | NA    | NA    | NA      | NA     |    | GWAS catalog |
| Interstitial lung disease                                                 | NA | NA | NA | NA | -0.001 | 0.002 | 1.007 | 0.008 | -0.0053 | 0.0046 |    | BBJ          |
| Pancreatic cancer                                                         | NA | NA | NA | NA | NA     | NA    | NA    | NA    | NA      | NA     |    | BBJ          |
| Periodontal disease                                                       | NA | NA | NA | NA | -0.001 | 0.002 | 1.019 | 0.007 | -0.0013 | 0.0045 |    | BBJ          |
| Tuberculosis                                                              | NA | NA | NA | NA | -0.048 | 0.208 | 1.031 | 0.007 | 0.0064  | 0.0053 |    | GWAS catalog |
| Tuberculosis2                                                             | NA | NA | NA | NA | NA     | NA    | NA    | NA    | NA      | NA     |    | BBJ          |

BBJ, BioBank Japan Project.

**Supplementary Table 10. Mendelian randomization study of Parkinson's disease and genetic correlated traits**

| Exposure                     | Outcome                      | NSNPs | MR Egger |       |       | Inverse variance weighted |       |       |
|------------------------------|------------------------------|-------|----------|-------|-------|---------------------------|-------|-------|
|                              |                              |       | Beta     | Se    | P     | Beta                      | Se    | P     |
| Parkinson's disease          | Gamma-glutamyl transferase   | 7     | -0.081   | 0.046 | 0.137 | -0.024                    | 0.013 | 0.065 |
| Gamma-glutamyl transferase   | Parkinson's disease          | 22    | -0.047   | 0.031 | 0.150 | -0.009                    | 0.012 | 0.430 |
| Parkinson's disease          | Height                       | 10    | 0.0003   | 0.024 | 0.989 | 0.005                     | 0.008 | 0.526 |
| Height                       | Parkinson's disease          | 25    | 0.004    | 0.017 | 0.815 | 0.004                     | 0.007 | 0.547 |
| Parkinson's disease          | Type 2 diabetes              | 10    | 0.016    | 0.030 | 0.620 | 0.004                     | 0.016 | 0.815 |
| Type 2 diabetes              | Parkinson's disease          | 25    | -0.017   | 0.032 | 0.587 | 0.006                     | 0.015 | 0.682 |
| Parkinson's disease          | Systemic lupus erythematosus | 7     | -0.121   | 0.356 | 0.748 | -0.121                    | 0.356 | 0.748 |
| Systemic lupus erythematosus | Parkinson's disease          | 20    | 0.010    | 0.217 | 0.965 | 0.020                     | 0.075 | 0.793 |
| Parkinson's disease          | Rheumatoid arthritis         | 11    | -0.012   | 0.051 | 0.813 | -0.001                    | 0.027 | 0.983 |
| Rheumatoid arthritis         | Parkinson's disease          | 26    | -0.004   | 0.049 | 0.939 | -0.009                    | 0.027 | 0.745 |

NSNPs, number of included SNPs; MR, Mendelian randomization; Beta, regression coefficient; Se, standard error of beta.

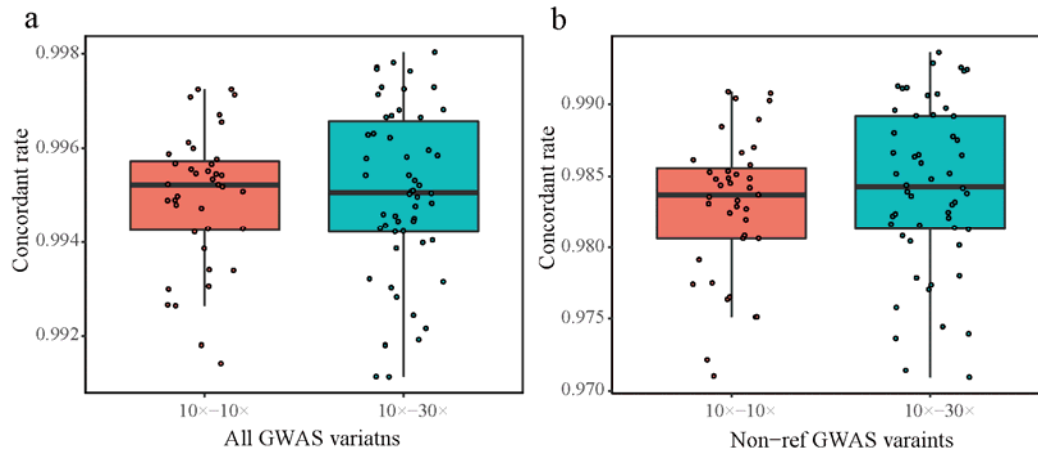

Supplementary Figure 1. Comparison of the genotype concordance between matched samples applied WGS with a medium degree of depth setting (10× depth) and a high degree of depth setting (30× depth). The box center represents the group median; the box edges reflect the value of the first and third quartile cutoffs, respectively; the length of the box is the interquartile range; the whiskers indicate the value for outliers (two interquartile ranges away from the median).

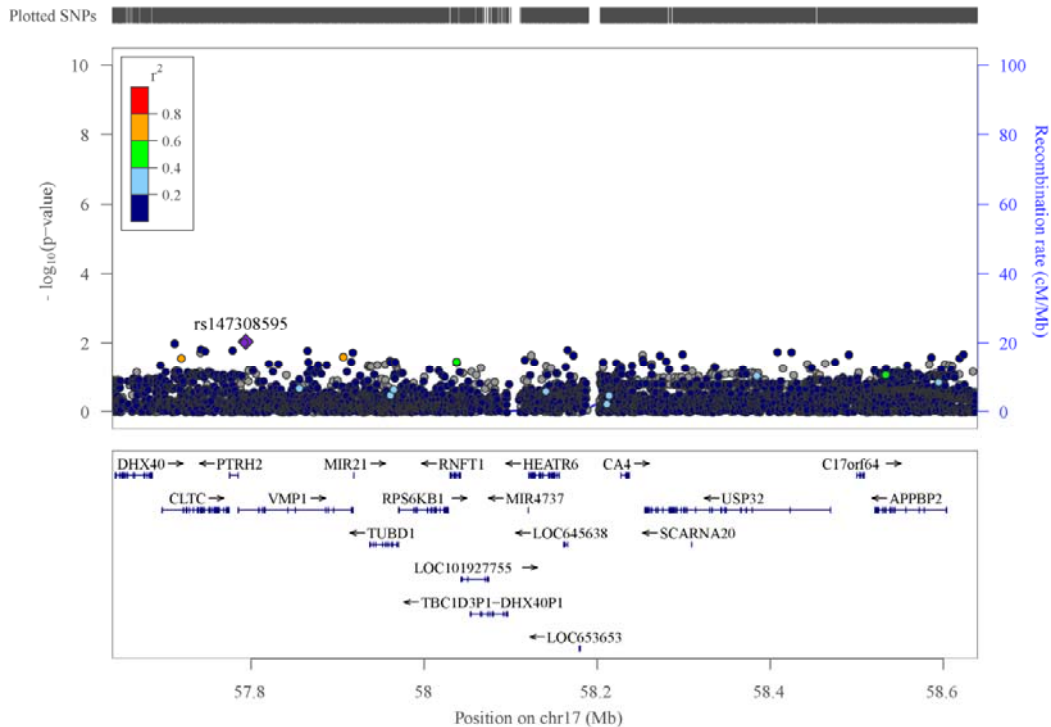

Supplementary Figure 2. Regional plot of the *HEATR6* locus in the European-ancestry PD results. Reference data of European-ancestry population from 1000 Genomes were used for linkage disequilibrium calculation.

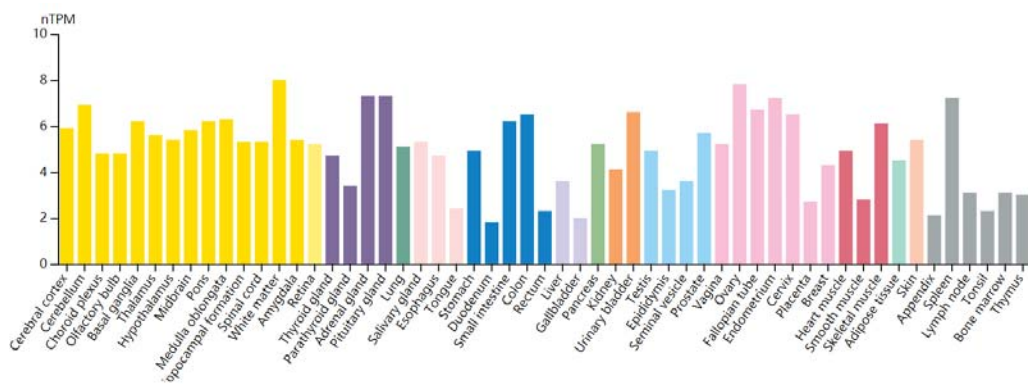

Supplementary Figure 3. Consensus RNA expression data of *HEATR6* from the Human Protein Atlas. The consensus dataset consists of normalized expression levels for 55 tissue types, created by combining the HPA and GTEx transcriptomics datasets using the internal normalization pipeline. Color-coding is based on different tissues, each consisting of tissues with functional features in common.

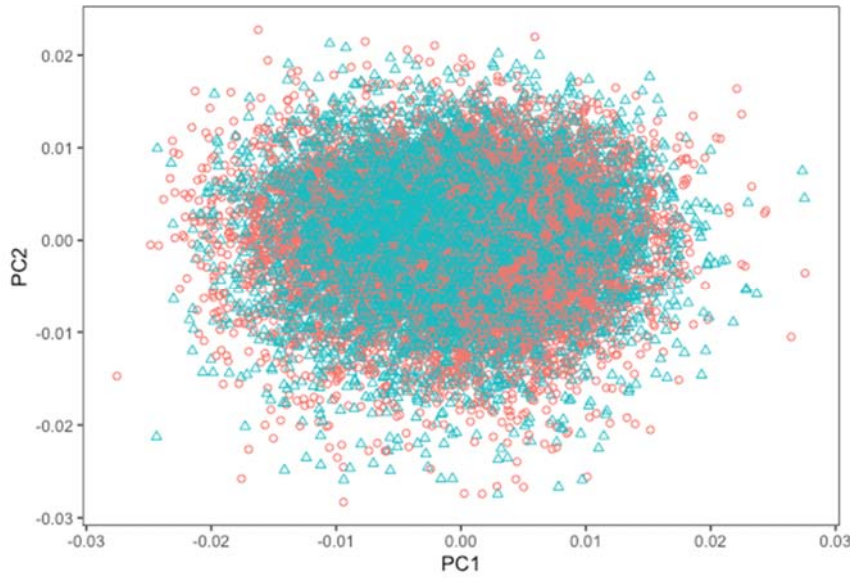

Supplementary Figure 4. PCA of our 8,209 PD cases and 9,454 controls in replication cohort using 37 non-associated SNPs.
